# Supplementary material for: Nano ceria supported nitrogen doped graphene as a highly stable and methanol tolerant electrocatalyst for oxygen reduction
Source: Royal Society of Chemistry journal article supplement (doi:10.1039/c6ra13218a), 2016-01-01
Supplement: c6ra13218a1.pdf [file c6ra13218a1.pdf]

## Supplementary Information

# Nano Ceria supported Nitrogen Doped Graphene as Highly Stable and Methanol Tolerant Electrocatalyst for Oxygen Reduction.

S. Soren<sup>a</sup>, B.D. Mohaptra<sup>a</sup>, S. Mishra<sup>a</sup>, A. K. Debnath<sup>b</sup>, D.K. Aswal<sup>b</sup>, K.S.K. Varadwaj<sup>a</sup> and P. Parhi<sup>a\*</sup>

- a. Department of chemistry, Ravenshaw University, Cuttack, Odisha-753003, India.  
E-mail: pparhi@ravenshawuniversity.ac.in; Tel: +91-8895193144.  
b. Technical Physics Division, Bhabha Atomic Research Center, Mumbai-400 085, India.

### Synthesis of GO, rGO, CeO<sub>2</sub>, NrGO and CeO<sub>2</sub>/rGO:

The Graphene oxide (GO) was prepared from graphite flakes (Sigma-Aldrich) using a modified Hummers method and dispersed in deionised water.<sup>1,2</sup>

To prepare CeO<sub>2</sub>, about 20 ml of 1,4-butanediol (spectrochem, India) and 250 mg of ceric ammonium nitrate (Fisher Scientific, India) were mixed together in a 60ml of teflon container and shaken well to form homogeneous mixture. Teflon container was fixed in a autoclave tightly and placed inside microwave system (MDS-60 Made of Sineo, China). Autoclave was kept under microwave radiation for 30 minutes at 180 °C (maximum 800 watts). The obtained products were washed with doubled distilled water, ethanol and acetone for 3 times and finally dried at 80 °C for 1 hr.

To prepare reduced graphene oxide (rGO), 0.05 g of dispersed graphene oxide in doubled distilled water was mixed in 20 ml of 1,4-butanediol using ultrasonication and the solution was treated with microwave radiation in a similar condition as in case of CeO<sub>2</sub>. The product formed was washed with deionised water, ethanol and acetone repeatedly by centrifugation and then dried in oven at 100 °C.

To prepare NrGO, 0.05 g of graphene oxide (dispersed in doubled distilled water) and 2 ml of 6.4M NH<sub>4</sub>OH was mixed with 20 ml of 1,4-butanediol using ultrasonication and then solvothermally treated under microwave radiation at 180 °C for 20

minutes. The product formed was washed in a similar manner as mentioned above during the synthesis of rGO.

To prepare CeO<sub>2</sub>/rGO nanocomposite, a mixture of 250 mg ceric ammonium nitrate, 50 mg Graphene oxide, and 20 ml 1, 4-Butanediol were ultrasonicated for 15 minutes and then solvothermally treated under microwave radiation at 180 °C for 20 minutes. The product formed was washed in a similar manner as discussed above.

**Physical Characterisation:** For XRD measurements about 1 gm of grinded samples were kept in a sample holder and was fitted inside Rigaku Advance X-ray Diffractometer operating at 40 KV (radiation source Cu K<sub>α</sub> (wavelength=1.5418 Å). FTIR analysis was carried out with the help of Thermo Fischer iS5 FTIR instrument. The XPS measurement was done using DESA-150 electron analyzer (Staib Instruments, Germany) having Mg-K<sub>α</sub> (1253.6 eV) as radiation source. Raman analysis of the samples were carried out on Horiba HR 800UV confocal Raman spectrophotometer with λ=632.8 nm and He-Ne laser as excitation source. Transmission Electron Microscope (TEM) images were obtained by the Model FEI Technai G2 S – Twin.

**Electrode Preparation:** For electrochemical studies homogeneous ink of the catalysts were prepared by following procedure. About 5mg of the catalyst was added to 5ml of 3:2 (v/v) water/isopropanol mixtures, followed by addition of 25 µl of 5wt% Nafion solution (Sigma-Aldrich) as binder. Then the solution was sonicated for 15 minutes to achieve homogeneous ink. For electrode preparation a 3 mm diameter glassy carbon disk (GCD) electrode was repeatedly polished with alumina powder (size 0.05 µm) and washed with distilled water, then dried in N<sub>2</sub> flow. About 12 µl of catalyst ink (~0.17 mg/cm<sup>2</sup>) was dropped onto the GCE using micropipette and allowed to dry for 3 hours in desiccator before electrochemical analysis.

**Rotating disk electrode (RDE) Measurements:** The RDE measurements were carried using an Autolab potentiostat/galvanostat (PGSTAT204, The Netherlands) in combination with a rotating disc electrode rotator (Autolab RDE-2, The Netherlands) and a speed control unit. All the measurements were conducted in a three-electrode cell system having Platinum wire as counter electrode, catalyst coated GCD electrode (Metroham Instrument Co.) as working electrode and Ag/AgCl (3M KCl) as

reference electrode. For ORR studies, the electrolyte was initially bubbled with O<sub>2</sub> for 20 minutes and during RDE experiments a continuous flow of O<sub>2</sub> was maintained over the electrolyte. All the ORR measurements were conducted at room temperature in oxygen saturated 0.1M KOH solution.

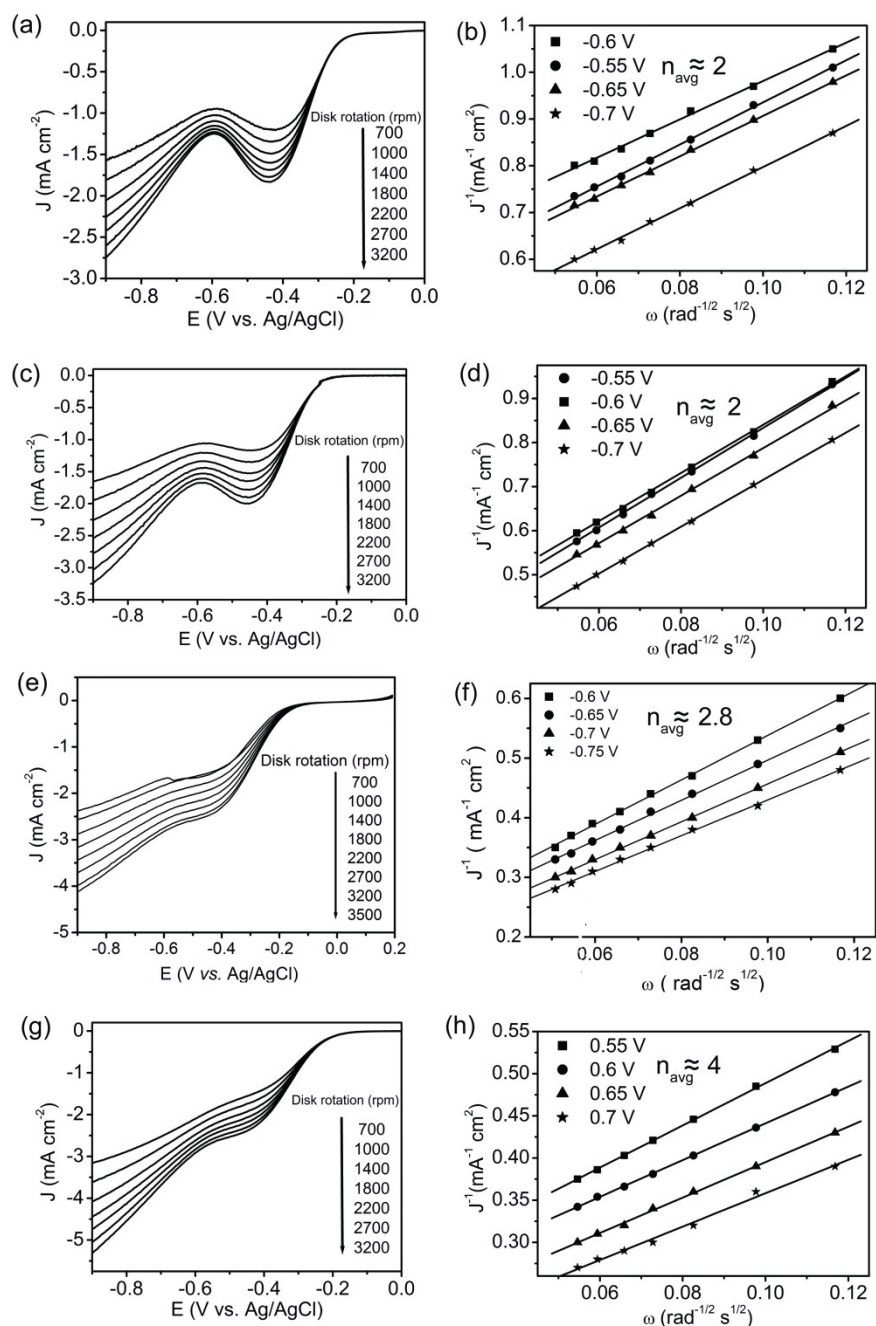

**Figure S1:** Graphs a, c, e and g represents oxygen reduction RDE curves on CeO<sub>2</sub>, rGO, NrGO and CeO<sub>2</sub>/rGO electrodes respectively. The graphs b, d, f and h represents corresponding K-L plot for the above mentioned catalysts at different potentials with average electron transfer number ( $n_{avg}$ ).

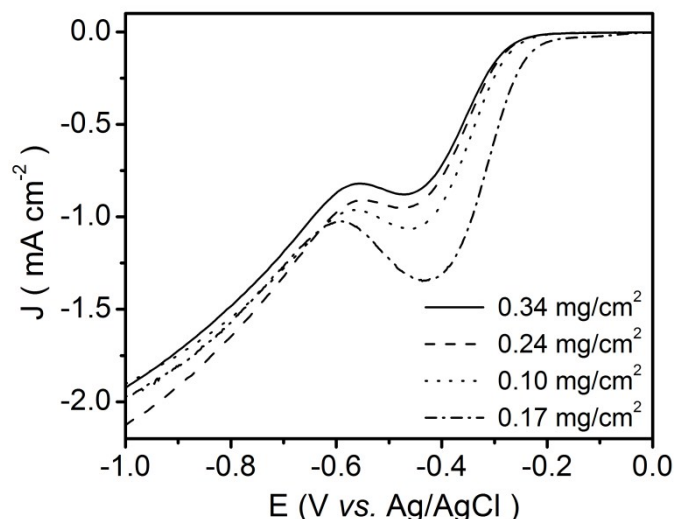

**Figure S2:** Shows ORR linear sweep voltammetry on electrodes supporting different amount of  $\text{CeO}_2$  (Conditions; 0.1 M KOH electrolyte, rotation 1000 rpm, scan rate  $10 \text{ mVs}^{-1}$ ).

In Figure S2, it is observed that  $0.17 \text{ mg/cm}^2$  loading amount is optimum to get high onset potential and high current density. Therefore in case of all other catalyst the same amount of catalyst loading is made.

**Chronoamperometric measurements:** For the Chronoamperometric stability measurements a three-electrode cell system having a Platinum weir as counter electrode, catalyst coated glassy carbon disc as working electrode and Ag/AgCl (3 M KCl) as reference electrode was taken and the electrode preparation was similar to that of RDE measurements. Initially, cathodic cycles (0.2 to  $-0.8 \text{ V}$ ) were performed for removal of adsorbed gases and stabilization of electrode surfaces. For all the measurements the working electrode was rotated at 1000 rpm and at a fixed potential of  $-0.35 \text{ V}$  in  $\text{O}_2$  saturated 0.1 M KOH electrolyte. All the chronoamperometric data's for methanol tolerant test are recorded after 500 sec of ORR to avoid initial rapid fall in current density.

### References:

1. Hummers, W. S.; Offeman, R. E. *J. Am. Chem. Soc.* **1958**, *80*, 1339.
2. Liang, Y.; Li, Y.; Wang, H.; Zhou, J.; Wang, J.; Reiger, T.; Dai, H. *Nat. Mater* **2011**, *10*, 780.
